# Supplementary material
Source: PubMed Central journal article supplement (PMC5902315)
Supplement: NIHMS957043-supplement-supplement_1.pdf [file NIHMS957043-supplement-supplement_1.pdf]

## List of Supplementary Materials

### Supplementary Material and Methods

**Figure S1.** Receiver Operating Characteristic curves of subgroup analyses in subjects with serum GGT 100-300 U/L and greater 300 U/L

**Figure S2.** Relationship between MMP-7 and hepatic fibrosis at the time of diagnosis of BA

**Figure S3.** Hepatic mRNA expression of *GGT* in biliary atresia (BA), intrahepatic cholestasis (IHC), and normal controls and of *Ggt1* in the experimental BA.

**Table S1.** List of 76 serum proteins differentially expressed biliary atresia (BA) and intrahepatic cholestasis (IHC)

**Table S2.** Sensitivity of MMP-7 to predict biliary atresia from the validation cohort #2

**Table S3.** Primer sequences and PCR product sizes for mouse *Mmp-7*, *Ggt1*, *Th1*, *TNF- $\alpha$*  and *IL8* related genes

**Supplementary file.** Protein results from SOMAScan<sup>®</sup>

## References

1. C. Liu, B. J. Aronow, A. G. Jegga, N. Wang, A. Miethke, R. Mourya, J. A. Bezerra, Novel resequencing chip customized to diagnose mutations in patients with inherited syndromes of intrahepatic cholestasis. *Gastroenterology* **132**, 119-126 (2007).
2. Y. Yang, D. M. Muzny, J. G. Reid, M. N. Bainbridge, A. Willis, P. A. Ward, A. Braxton, J. Beuten, F. Xia, Z. Niu, M. Hardison, R. Person, M. R. Bekheirnia, M. S. Leduc, A. Kirby, P. Pham, J. Scull, M. Wang, Y. Ding, S. E. Plon, J. R. Lupski, A. L. Beaudet, R.

## **SUPPLEMENTARY MATERIAL**

### **Material and Methods**

#### **Tissue Histology**

Histological analyses of tissues stained with hematoxylin/eosin were performed by an investigator unaware of the experimental or control origin of samples. Bile ducts were classified as obstructed or patent, while liver histology was scored according to portal inflammation and area of lobular necrosis as follows: 1) mild portal inflammation without area of necrosis = mild, 2) mild to moderate portal inflammation with patchy necrosis = moderate, and 3) moderate to severe portal inflammation with large area of necrosis = severe.

#### **Singleplex Bead-based assay and PCR**

MMP-7 concentrations in the sample supernatants were determined by enzyme-linked immunosorbent assay (ELISA) using Milliplex™ Multiplex kits (Millipore, Billerica, MA, USA) according to manufacturer's protocol, and described in Supplementary Methods. Briefly, 25µL sample in duplicate was incubated with 25µL antibody coated beads in a 96 well multiscreen filter plate overnight at 4°C on a plate shaker. Plates were then washed twice on a vacuum apparatus, followed by the addition of 25µL of secondary antibody and incubation at room temperature for 1 hour with gentle shaking. To the plate, 25µL of streptavidin-RPE were added and incubated for 30 minutes, then washed and read using the Bio-Plex™ (Bio-Rad, Hercules, CA, USA). Concentrations were calculated from standard curves using recombinant proteins and expressed in ng/mL.

#### **Quantitative PCR**

Total RNA was isolated from the livers and extrahepatic bile ducts of RRV- or saline-injected BALB/c mice with or without Batimastat- or vehicle- injection using the RNeasy Mini Kit, according to manufacturer's protocol (Qiagen Inc); RNA integrity was verified by agarose gel electrophoresis as

described previously.(29) All samples were then reverse transcribed to cDNA using the High Capacity RNA-to-cDNA Kit (Applied Biosystems, Waltham, MA USA) and used for real-time PCR on a Stratagene Mx3000P thermocycler (Agilent Technologies Inc.) to detect relative concentrations of individual mRNAs. PCR amplifications were performed with specific primers of *Mmp-7*, *Ggt1*, *Cxcl1*, *Cxcl2*, *Cxcl5*, *Cxcl9*, *Cxcl10*, *Cxcl11*, *Tnfa*, *Ifng*, and *IL12p40* (table S3). mRNA expression of target genes was normalized to the endogenous reference *Gapdh* gene.

### **Immunohistochemistry and automated image analysis**

Immunohistochemistry was performed on 5 µm paraffin-embedded tissue sections as described previously (43), using 1:50 polyclonal MMP-7 antibody (Cloud-Clone Corp, Houston, TX, USA) in blocking serum overnight at 4°C. Biotinylated anti-rabbit antibody (Vector Laboratories, Burlingame, CA, USA) was used as secondary antibody followed by Avidin/Biotinylated-detection (VECTASTAIN ABC reagent PK-4001, Vector Laboratories) and the 3,3'-diaminobenzidine (DAB) substrate (Vector Kit, SK-4100, Vector Laboratories). The same protocol was used in human and mouse tissue. An additional liver biopsy slide from each BA subject was subjected for Masson's trichrome staining. For image analyses, entire sections were scanned and subdivided to depict the portal tracts using Olympus BX51 microscope (Olympus America Inc., PA, USA) and CellSens Dimension digital imaging software (Olympus Corporation, version 1.8.1). Automated quantification of MMP-7 expression was performed on scanned images with NIS Nikon Elements software using red-green-blue (RGB) general analysis. Positive expression was defined choosing DAB-positive brown area (DAB+). Portal tracts were selected and enumerated as regions of interest (ROI). RGB general analysis was used in hue, saturation, and intensity modes to identify DAB+ areas. All subdivided regions were averaged to report surface area of DAB+ per portal tract in each sample. For Masson's trichrome

staining, positive collagen was defined by blue areas with use of hue, saturation and intensity modes. The quantification was reported as surface area of collagen (blue stained)/portal tract.

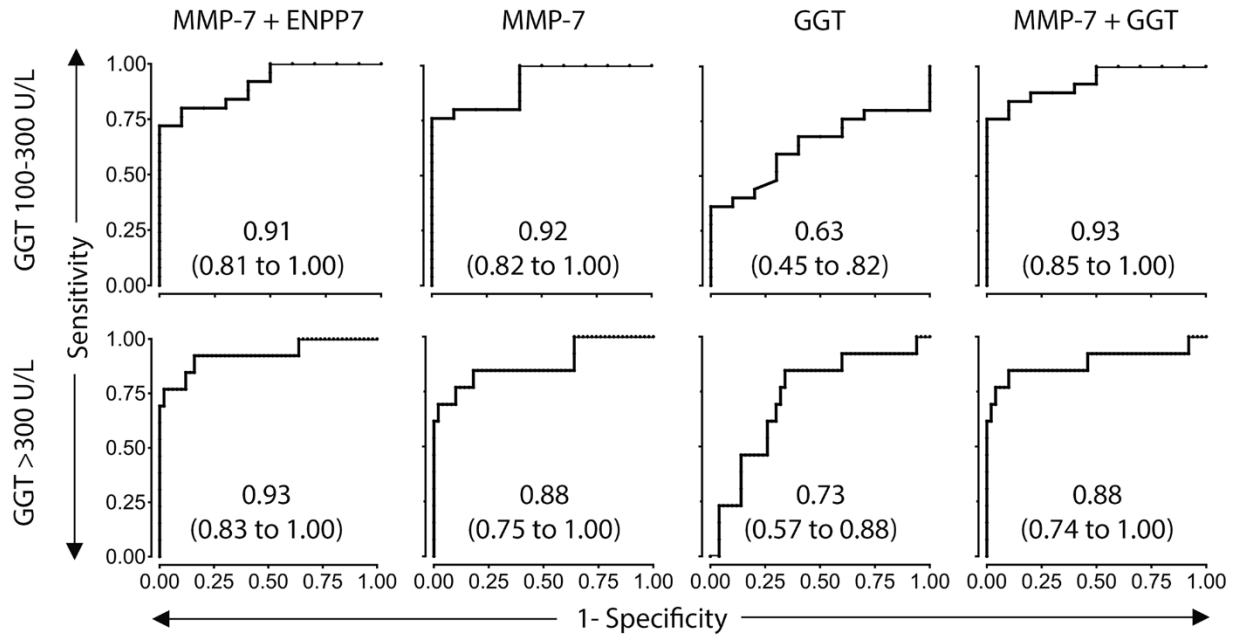

**Fig. S1.** Receiver operating characteristic curves and area under the curves (95% CI) for subjects with GGT 100-300 U/L (N=10 for BA, N=25 for IHC) and >300 U/L (N=50 for BA, N=13 for IHC). Groups were formed with a combination of subjects with BA and IHC in the discovery cohort and validation cohort #1 based on the availability of GGT.

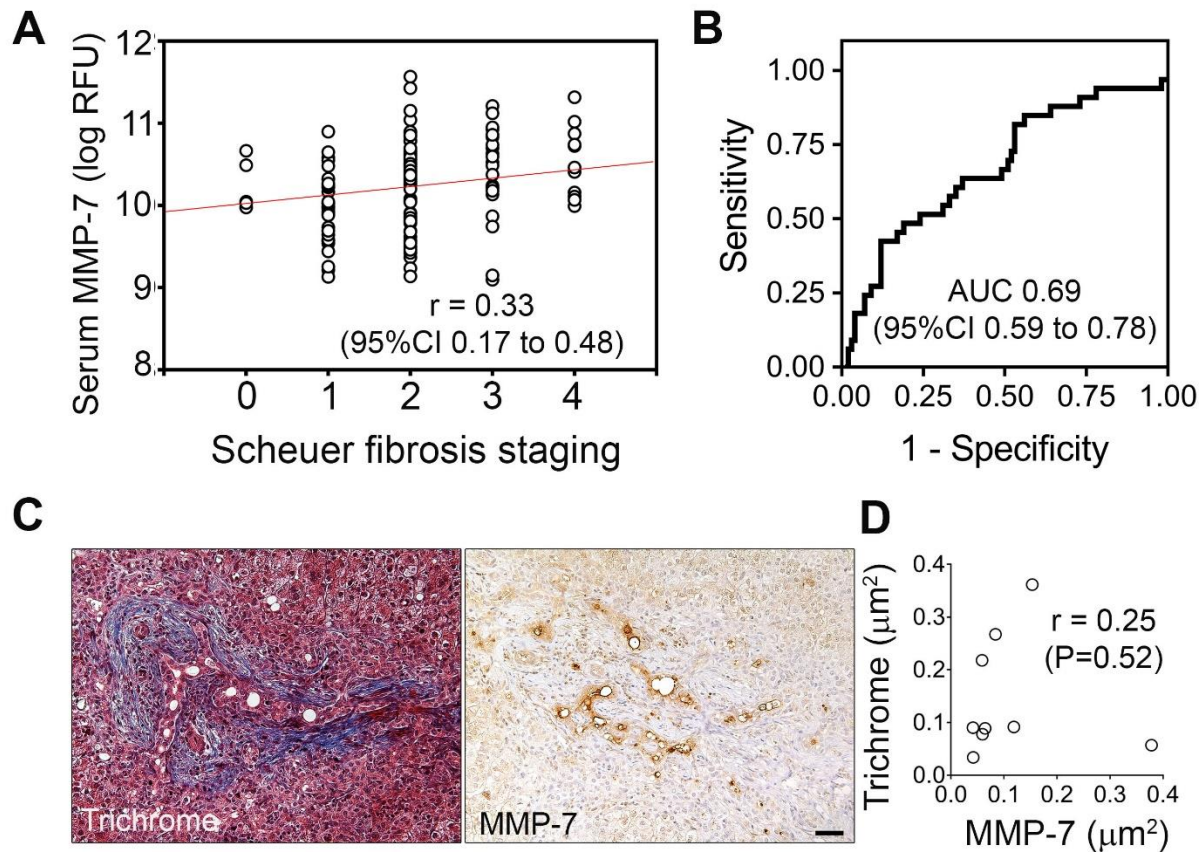

**Fig. S2. Relationship between MMP-7 and hepatic fibrosis at the time of diagnosis of BA.**

(A) Low correlation between serum MMP-7 levels and histological fibrosis at the time of diagnosis (Spearman correlation). (B) The ROC curve and predictive value of serum MMP-7 for histological fibrosis staging (no-mild fibrosis: Scheuer fibrosis stage=0-1 vs. moderate-severe stage=2-4; N=135). (C) Representative immunostaining of MMP-7 and of trichrome staining performed in consecutive sections of the same liver biopsy from subjects with biliary atresia. Scale bar = 50  $\mu\text{m}$ . (D) Surface area of tissue sections stained for MMP-7 by immunohistochemistry and trichrome stain in biliary atresia (N=9). Dots represent average surface area of DAB+ (or trichrome+) in portal tract areas of each sample. AUC, area under the curve; RFU, relative fluorescent unit.

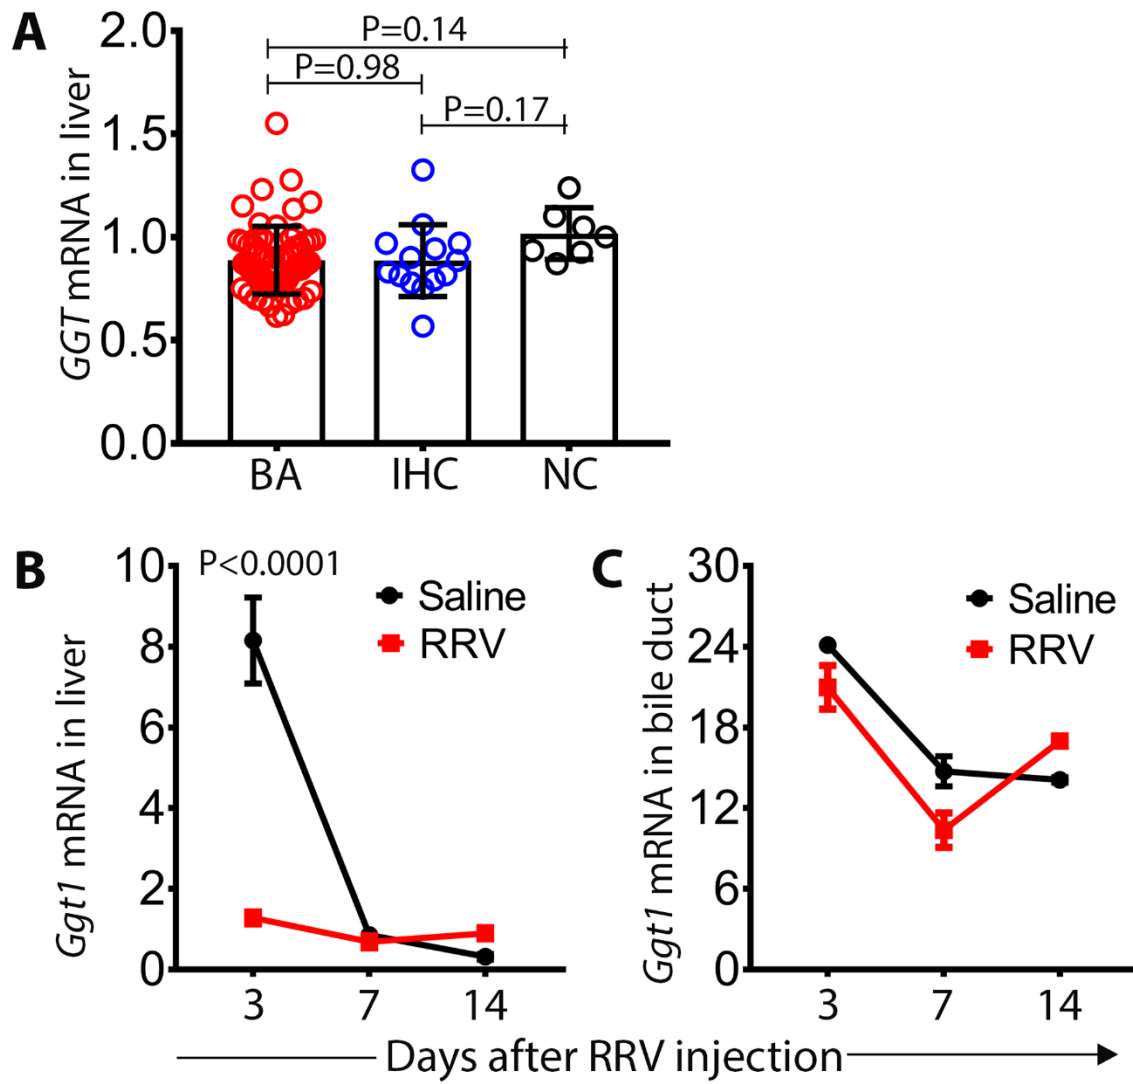

**Fig. S3. *GGT* mRNA expression** (A) hepatic *GGT* mRNA in biliary atresia (BA; N=64), intrahepatic cholestasis (IHC; N=14) and normal controls (NC; N=7). (B) *Ggt1* mRNA in the experimental BA; liver and bile duct (C). N= 3-4/group.

**Table S1:** List of 76 serum proteins differentially expressed biliary atresia (BA) and intrahepatic cholestasis (IHC) (FDR adjusted P-value  $\leq 0.05$ )

| Protein                 | Protein Full Name                                                | EntrezGene | Mean expression*<br>in BA | Mean expression*<br>in IHC | Mean expression*<br>in NC | Adjusted P<br>BA vs IHC | Fold change<br>BA : IHC |
|-------------------------|------------------------------------------------------------------|------------|---------------------------|----------------------------|---------------------------|-------------------------|-------------------------|
| MMP-7                   | Matrilysin                                                       | MMP7       | 10.148                    | 8.724                      | 8.099                     | 1.05E-14                | 4.153                   |
| IL-8                    | Interleukin-8                                                    | CXCL8      | 9.735                     | 8.669                      | 7.971                     | 4.16E-08                | 2.902                   |
| SARP-2                  | Secreted frizzled-related protein 1                              | SFRP1      | 8.038                     | 7.062                      | 6.708                     | 0.000111                | 2.655                   |
| IGFBP-1                 | Insulin-like growth factor-binding protein 1                     | IGFBP1     | 8.800                     | 7.991                      | 8.894                     | 0.000396                | 2.244                   |
| Midkine                 | Midkine                                                          | MDK        | 9.743                     | 8.950                      | 8.250                     | 0.006104                | 2.209                   |
| PIGR                    | Polymeric immunoglobulin receptor                                | PIGR       | 10.594                    | 9.807                      | 8.613                     | 0.000535                | 2.195                   |
| Collectin Kidney 1      | Collectin-11                                                     | COLEC11    | 10.273                    | 9.517                      | 8.857                     | 1.3E-07                 | 2.130                   |
| ADAM 9                  | Disintegrin and metalloproteinase domain-containing protein 9    | ADAM9      | 8.882                     | 8.145                      | 7.889                     | 1.28E-05                | 2.090                   |
| GCP-2                   | C-X-C motif chemokine 6                                          | CXCL6      | 9.152                     | 8.450                      | 7.943                     | 0.003651                | 2.019                   |
| ENPP7                   | Ectonucleotide pyrophosphatase/phosphodiesterase family member 7 | ENPP7      | 10.828                    | 10.154                     | 8.993                     | 0.027054                | 1.961                   |
| IL-18 Ra                | Interleukin-18 receptor 1                                        | IL18R1     | 7.614                     | 7.062                      | 6.581                     | 2.16E-07                | 1.737                   |
| BSSP4                   | Brain-specific serine protease 4                                 | PRSS22     | 8.932                     | 8.454                      | 8.205                     | 0.000205                | 1.613                   |
| HGF                     | Hepatocyte growth factor                                         | HGF        | 7.895                     | 7.421                      | 7.253                     | 0.000163                | 1.608                   |
| TSP2                    | Thrombospondin-2                                                 | THBS2      | 8.536                     | 8.089                      | 7.078                     | 0.013479                | 1.563                   |
| LIMP II                 | Lysosome membrane protein 2                                      | SCARB2     | 7.134                     | 6.692                      | 6.590                     | 0.000202                | 1.557                   |
| PRL                     | Prolactin                                                        | PRL        | 9.061                     | 8.624                      | 8.560                     | 0.002421                | 1.547                   |
| ASAH2                   | Neutral ceramidase                                               | ASAH2      | 7.875                     | 7.439                      | 7.884                     | 0.006097                | 1.547                   |
| Fractalkine/<br>CX3CL-1 | Fractalkine                                                      | CX3CL1     | 8.336                     | 7.940                      | 7.834                     | 0.000357                | 1.486                   |
| FSTL3                   | Follistatin-related protein 3                                    | FSTL3      | 9.990                     | 9.595                      | 9.083                     | 0.00035                 | 1.485                   |
| annexin II              | Annexin A2                                                       | ANXA2      | 9.587                     | 9.229                      | 9.074                     | 0.012437                | 1.430                   |
| TIMP-1                  | Metalloproteinase inhibitor 1                                    | TIMP1      | 6.952                     | 6.616                      | 6.242                     | 8.71E-05                | 1.399                   |
| Activin A               | Inhibin beta A chain                                             | INHBA      | 9.330                     | 9.009                      | 8.699                     | 0.047014                | 1.378                   |

|                         |                                                                   |          |        |        |        |          |       |
|-------------------------|-------------------------------------------------------------------|----------|--------|--------|--------|----------|-------|
| Cathepsin B             | Cathepsin B                                                       | CTSB     | 8.728  | 8.421  | 7.493  | 0.041262 | 1.359 |
| 6Ckine                  | C-C motif chemokine 21                                            | CCL21    | 9.583  | 9.278  | 9.218  | 0.006979 | 1.357 |
| BAFF                    | Tumor necrosis factor ligand<br>superfamily member 13B            | TNFSF13B | 8.308  | 8.023  | 7.872  | 0.044416 | 1.330 |
| C7                      | Complement component C7                                           | C7       | 7.285  | 7.026  | 6.950  | 0.000745 | 1.296 |
| LG3BP                   | Galectin-3-binding protein                                        | LGALS3BP | 7.128  | 6.871  | 7.237  | 0.046014 | 1.293 |
| IGFBP-2                 | Insulin-like growth factor-binding<br>protein 2                   | IGFBP2   | 11.543 | 11.287 | 11.090 | 0.027364 | 1.292 |
| PTHrP                   | Parathyroid hormone-related protein                               | PTHLH    | 7.188  | 6.958  | 6.952  | 0.036308 | 1.258 |
| a1-<br>Antichymotrypsin | Alpha-1-antichymotrypsin                                          | SERPINA3 | 12.183 | 11.978 | 12.285 | 0.001733 | 1.227 |
| NID2                    | Nidogen-2                                                         | NID2     | 9.298  | 9.168  | 9.079  | 0.047006 | 1.138 |
| CTACK                   | C-C motif chemokine 27                                            | CCL27    | 7.544  | 7.655  | 7.484  | 0.004261 | 0.894 |
| CRDL1                   | Chordin-like protein 1                                            | CHRD1    | 7.339  | 7.470  | 7.481  | 0.007267 | 0.877 |
| DLL1                    | Delta-like protein 1                                              | DLL1     | 7.910  | 8.047  | 8.057  | 0.025671 | 0.872 |
| IGFBP-6                 | Insulin-like growth factor-binding<br>protein 6                   | IGFBP6   | 6.074  | 6.217  | 6.156  | 0.012437 | 0.867 |
| IGFBP-5                 | Insulin-like growth factor-binding<br>protein 5                   | IGFBP5   | 6.490  | 6.635  | 6.715  | 0.044088 | 0.866 |
| CFC1                    | Cryptic protein                                                   | CFC1     | 8.288  | 8.438  | 8.496  | 0.008787 | 0.861 |
| GX                      | Group 10 secretory phospholipase A2                               | PLA2G10  | 6.619  | 6.780  | 6.661  | 0.036161 | 0.851 |
| CHST6                   | Carbohydrate sulfotransferase 6                                   | CHST6    | 6.313  | 6.481  | 6.390  | 0.044378 | 0.846 |
| RGMB                    | RGM domain family member B                                        | RGMB     | 7.843  | 8.014  | 7.969  | 0.005148 | 0.843 |
| Gelsolin                | Gelsolin                                                          | GSN      | 6.493  | 6.666  | 6.713  | 0.008173 | 0.841 |
| TNR4                    | Tumor necrosis factor receptor<br>superfamily member 4            | TNFRSF4  | 7.164  | 7.341  | 7.292  | 0.012211 | 0.838 |
| WIF-1                   | Wnt inhibitory factor 1                                           | WIF1     | 8.058  | 8.242  | 8.457  | 0.036308 | 0.832 |
| LSAMP                   | Limbic system-associated membrane<br>protein                      | LSAMP    | 8.129  | 8.323  | 8.293  | 0.027364 | 0.823 |
| SET                     | Protein SET                                                       | SET      | 9.406  | 9.602  | 9.894  | 0.035958 | 0.822 |
| EPHB2                   | Ephrin type-B receptor 2                                          | EPHB2    | 7.650  | 7.855  | 7.698  | 0.035958 | 0.814 |
| LRIG3                   | Leucine-rich repeats and<br>immunoglobulin-like domains protein 3 | LRIG3    | 9.602  | 9.839  | 9.731  | 0.044256 | 0.789 |
| Kallikrein 11           | Kallikrein-11                                                     | KLK11    | 8.107  | 8.346  | 8.074  | 0.012437 | 0.787 |

|                |                                                               |          |        |        |        |          |       |
|----------------|---------------------------------------------------------------|----------|--------|--------|--------|----------|-------|
| Notch-3        | Neurogenic locus notch homolog protein 3                      | NOTCH3   | 6.481  | 6.721  | 6.709  | 0.027102 | 0.786 |
| CSF-1          | Macrophage colony-stimulating factor 1                        | CSF1     | 8.055  | 8.296  | 7.764  | 0.006979 | 0.785 |
| TSP4           | Thrombospondin-4                                              | THBS4    | 11.330 | 11.573 | 11.368 | 0.047167 | 0.784 |
| RET            | Proto-oncogene tyrosine-protein kinase receptor Ret           | RET      | 7.273  | 7.526  | 7.559  | 0.001617 | 0.776 |
| MATN2          | Matrilin-2                                                    | MATN2    | 10.218 | 10.479 | 10.308 | 0.006784 | 0.770 |
| Aggrecan       | Aggrecan core protein                                         | ACAN     | 8.641  | 8.904  | 9.103  | 0.036308 | 0.768 |
| Periostin      | Periostin                                                     | POSTN    | 9.290  | 9.558  | 9.279  | 0.037223 | 0.764 |
| HPLN1          | Hyaluronan and proteoglycan link protein 1                    | HAPLN1   | 9.404  | 9.676  | 9.863  | 0.043921 | 0.762 |
| Angiotensin-2  | Angiotensin-2                                                 | ANGPT2   | 7.587  | 7.863  | 7.512  | 0.016486 | 0.759 |
| EMR2           | EGF-like module-containing mucin-like hormone receptor-like 2 | EMR2     | 6.545  | 6.825  | 6.631  | 0.047006 | 0.756 |
| ROR1           | Tyrosine-protein kinase transmembrane receptor ROR1           | ROR1     | 8.386  | 8.666  | 8.670  | 0.006665 | 0.756 |
| bFGF-R         | Fibroblast growth factor receptor 1                           | FGFR1    | 9.603  | 9.900  | 9.832  | 0.000878 | 0.743 |
| PCI            | Plasma serine protease inhibitor                              | SERPINA5 | 9.821  | 10.119 | 10.238 | 0.012211 | 0.742 |
| DAF            | Complement decay-accelerating factor                          | CD55     | 8.248  | 8.546  | 8.429  | 0.000059 | 0.742 |
| IL-11 RA       | Interleukin-11 receptor subunit alpha                         | IL11RA   | 9.429  | 9.729  | 9.788  | 0.007267 | 0.741 |
| SHBG           | Sex hormone-binding globulin                                  | SHBG     | 8.616  | 8.920  | 8.740  | 0.016486 | 0.738 |
| MRC2           | C-type mannose receptor 2                                     | MRC2     | 9.294  | 9.603  | 9.425  | 0.012211 | 0.735 |
| MMP-13         | Collagenase 3                                                 | MMP13    | 9.299  | 9.625  | 9.569  | 0.041262 | 0.722 |
| BOC            | Brother of CDO                                                | BOC      | 8.855  | 9.187  | 9.024  | 0.034184 | 0.717 |
| Sonic Hedgehog | Sonic hedgehog protein                                        | SHH      | 7.056  | 7.412  | 7.593  | 0.022793 | 0.700 |
| CDON           | Cell adhesion molecule-related/down-regulated by oncogenes    | CDON     | 10.169 | 10.555 | 10.610 | 0.009042 | 0.680 |
| URB            | Coiled-coil domain-containing protein 80                      | CCDC80   | 8.319  | 8.708  | 8.528  | 0.000202 | 0.678 |
| kallikrein 8   | Kallikrein-8                                                  | KLK8     | 9.438  | 9.843  | 9.645  | 0.008444 | 0.667 |
| CK-MB          | Creatine kinase M-type:Creatine kinase B-type heterodimer     | CKB CKM  | 6.502  | 6.914  | 7.458  | 0.02934  | 0.662 |
| SLIK5          | SLIT and NTRK-like protein 5                                  | SLITRK5  | 9.511  | 9.961  | 9.939  | 0.002152 | 0.638 |

|                         |                                                 |       |       |       |       |          |       |
|-------------------------|-------------------------------------------------|-------|-------|-------|-------|----------|-------|
| IL-17B                  | Interleukin-17B                                 | IL17B | 6.220 | 6.672 | 6.401 | 0.003651 | 0.636 |
| DAN                     | Neuroblastoma suppressor of<br>tumorigenicity 1 | NBL1  | 8.763 | 9.304 | 9.067 | 0.000435 | 0.582 |
| Carbonic<br>anhydrase 6 | Carbonic anhydrase 6                            | CA6   | 6.961 | 7.569 | 8.504 | 0.029891 | 0.544 |

\*Serum expression expressed in log-transformed relative fluorescence unit.

BA: Biliary atresia

IHC: Intrahepatic cholestasis

NC: Normal controls

**Table S2.** Sensitivity of MMP-7 to predict biliary atresia from the validation cohort #2 (BA subjects, N = 105)

| Cutoff (probability) | True positive | False negative | Sensitivity |
|----------------------|---------------|----------------|-------------|
| 0                    | 105           | 0              | 1           |
| 0.1                  | 104           | 1              | 0.99        |
| 0.2                  | 103           | 2              | 0.98        |
| 0.3                  | 103           | 2              | 0.98        |
| 0.4                  | 102           | 3              | 0.97        |
| 0.5                  | 101           | 4              | 0.96        |
| 0.6                  | 100           | 5              | 0.95        |
| 0.7                  | 98            | 7              | 0.93        |
| 0.8                  | 97            | 8              | 0.92        |
| 0.9                  | 86            | 19             | 0.82        |
| 1.0                  | 0             | 105            | 0           |

**Table S3.** Primer sequences and PCR product sizes for mouse *Mmp-7*, *Ggt1*, *Th1*, *TNF- $\alpha$*  and *IL8* related genes

| Gene           | Mouse Primer Sequences                                                     | Annealing Temp (°C) | Product size (bp) |
|----------------|----------------------------------------------------------------------------|---------------------|-------------------|
| <i>Mmp-7</i>   | For: 5'-GCACATCAGTGGGAACAGGC-3'<br>Rev: 5'-GCATTCCTTGAGGTTGTCCAC-3'        | 51.9                | 103               |
| <i>Ggt1</i>    | For: 5'-AGCCCGCATCACTGATGAAA-3'<br>Rev: 5'-CTCTGAAACCGCAGACAGGT-3'         | 76.4                | 103               |
| <i>Cxcl1</i>   | For: 5'-CAAACCGAAGTCATAGCCACAC-3'<br>Rev: 5'-TTGGGGACACCTTTTAGCATC-3'      | 54.0                | 107               |
| <i>Cxcl2</i>   | For: 5'-TGAACAAAGGCAAGGCTAACTG-3'<br>Rev: 5'-AAGTGAAGTCTCAGACAGCGAGG-3'    | 56.4                | 146               |
| <i>Cxcl5</i>   | For: 5'-TGGGCAGTGACAAAAAGAAAGC-3'<br>Rev: 5'-AAATCCGTGGGTGGAGAGAATC-3'     | 55.2                | 138               |
| <i>Cxcl9</i>   | For: 5'-GAGCTAGATAGACCTCACCAAG-3'<br>Rev: 5'-CCATTAGCACCATCTCTGA-3'        | 54.7                | 101               |
| <i>Cxcl10</i>  | For: 5'-TCGCTCAAGTGGCTGGGATG-3'<br>Rev: 5'-TAGGGAGGACAAGGAGGGTGTG-3'       | 58.9                | 117               |
| <i>Cxcl11</i>  | For: 5'-CAAGGCTTCCTTATGTTCAAACAG-3'<br>Rev: 5'-TTACAGAAGCTTTCTCGATCTCTG-3' | 85                  | 94                |
| <i>Tnfa</i>    | For: 5'-AAGGGAGAGTGGTCAGTTGCC-3'<br>Rev: 5'-CCTCAGGGAAGAGTCTGGAAAGG-3'     | 55                  | 95                |
| <i>Ifng</i>    | For: 5'-GGCTGTCCCTGAAAGAAAGC-3'<br>Rev: 5'-GAGCGAGTTATTTGTCATTTCGG-3'      | 53.5                | 102               |
| <i>IL12p40</i> | For: 5'-AAAGGCTGGGTATCGGTGG-3'<br>Rev: 5'-ACTGGCTGTGCTGGAAGTCC-3'          | 55.7                | 118               |
| <i>Gapdh</i>   | For: 5'-TGGTTTGACAATGAATACGGCTAC-3'<br>Rev: 5'-GGTGGGTGGTCCAAGGTTTC-3'     | 55.1                | 92                |
